# Supplementary material for: The Effectiveness of Soil Extracts from Selangor Peat Swamp and Pristine Forest Soils on the Growth of Green Microalgae sp.
Source: MDPI journal article supplement (doi:10.3390/f13010079), 2022-01-07
Supplement: s1 [file s1]

## Supplementary Figure S1

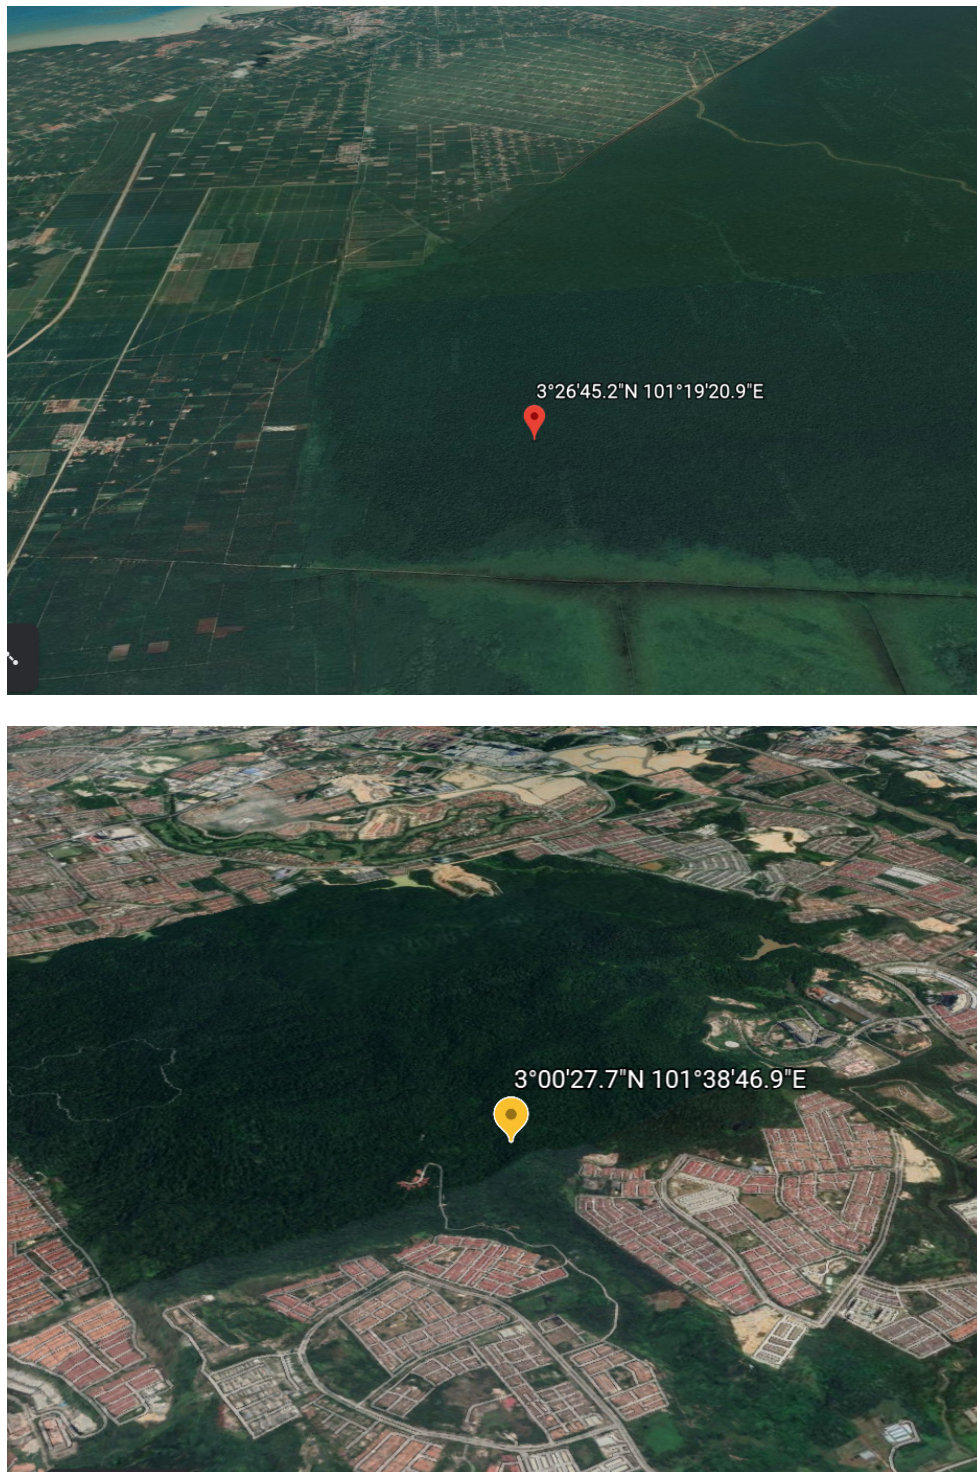

**Figure S1:** Map of sampling sites in this study A) Raja Musa Forest Reserve (RMFR) (3°26'45.2"N 101°19'20.9"E) and B) Ayer Hitam Forest Reserve (AHFR) (3°00'27.7"N 101°38'46.9"E), Selangor Malaysia
